# Supplementary material
Source: PubMed Central journal article supplement (PMC2888436)

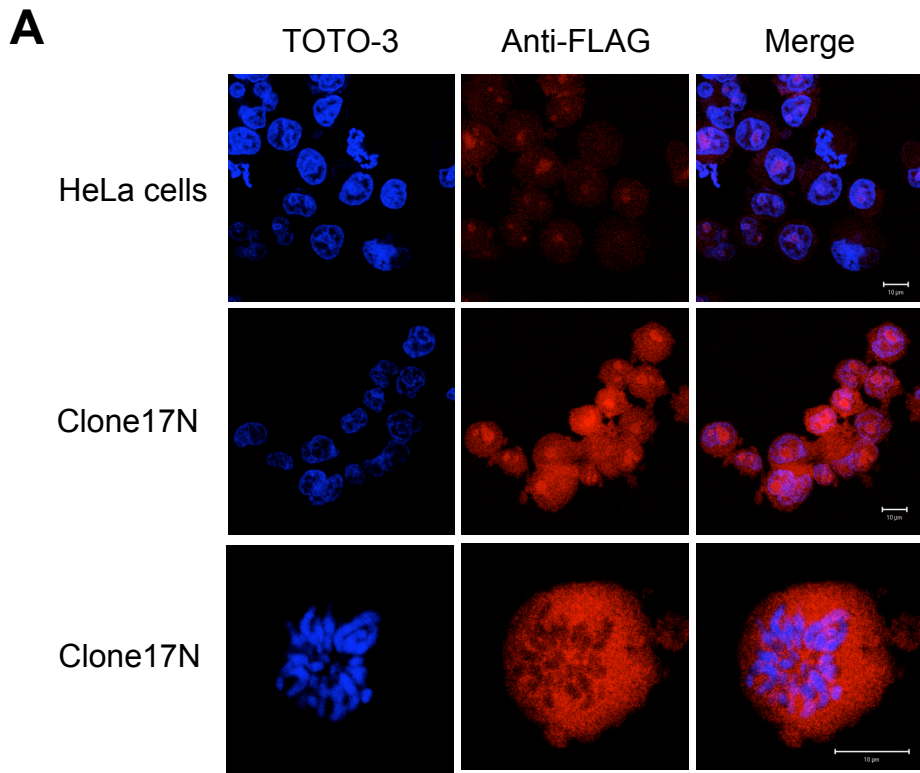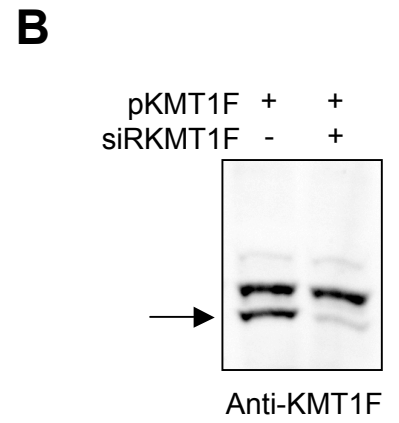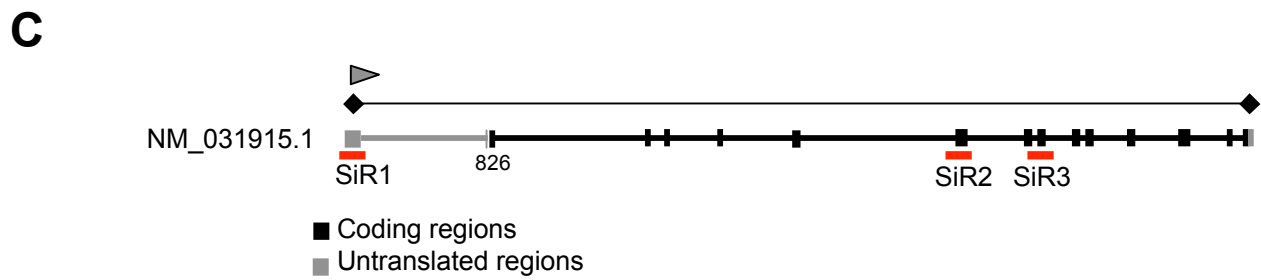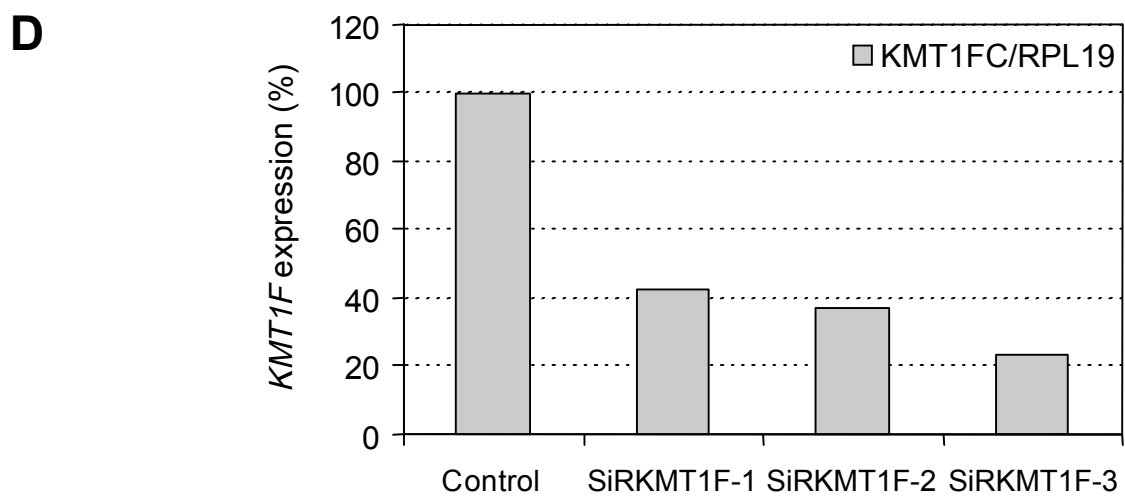

A

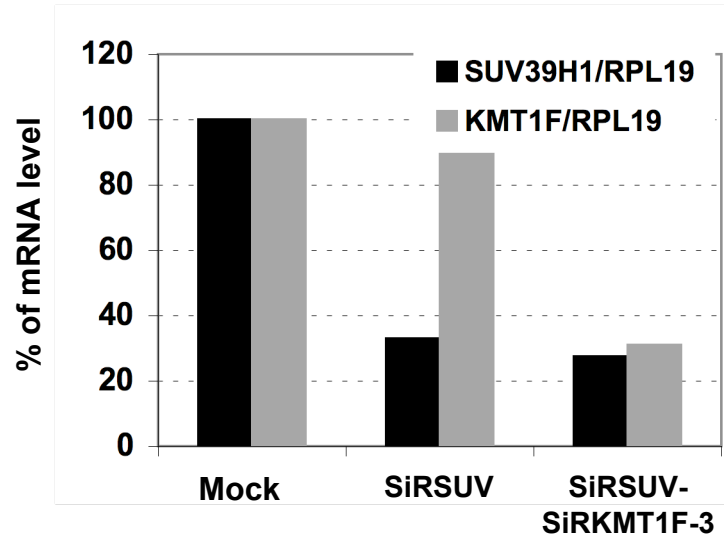

B

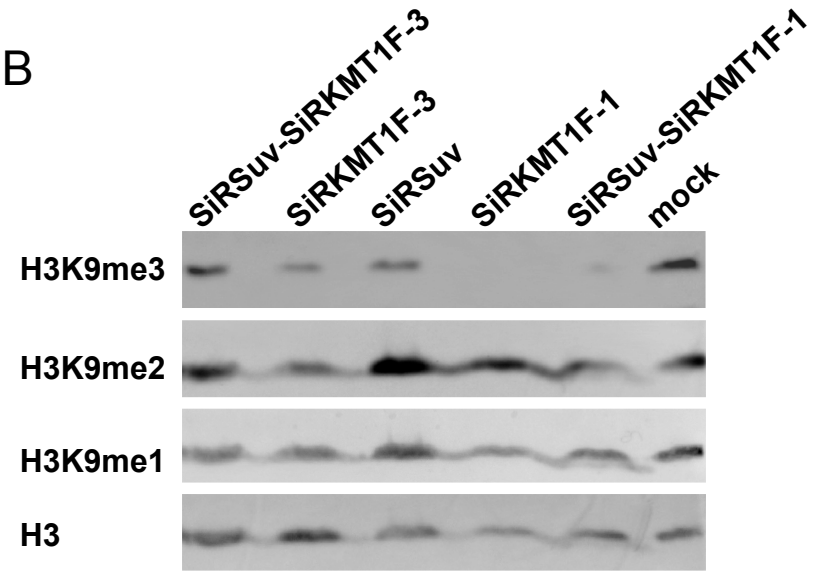

C

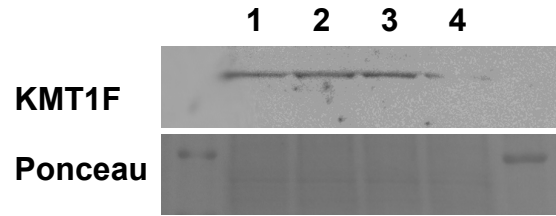

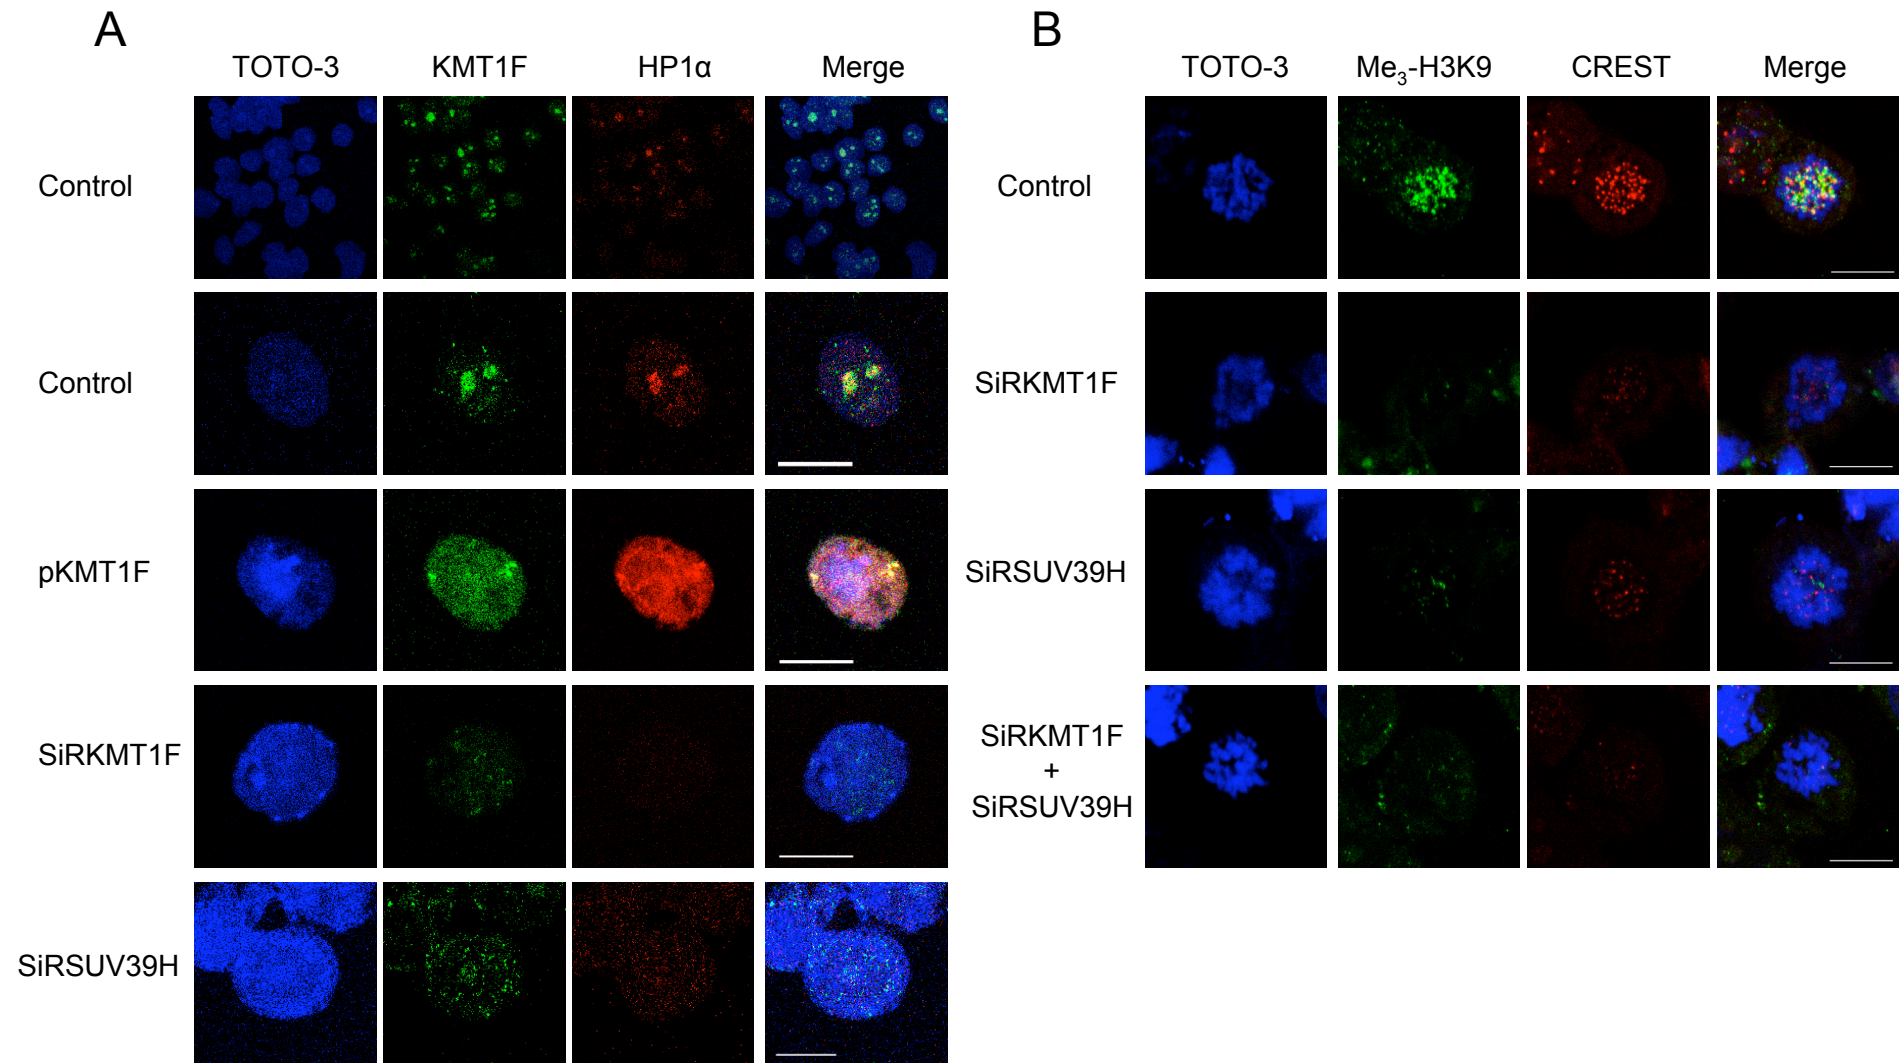

A

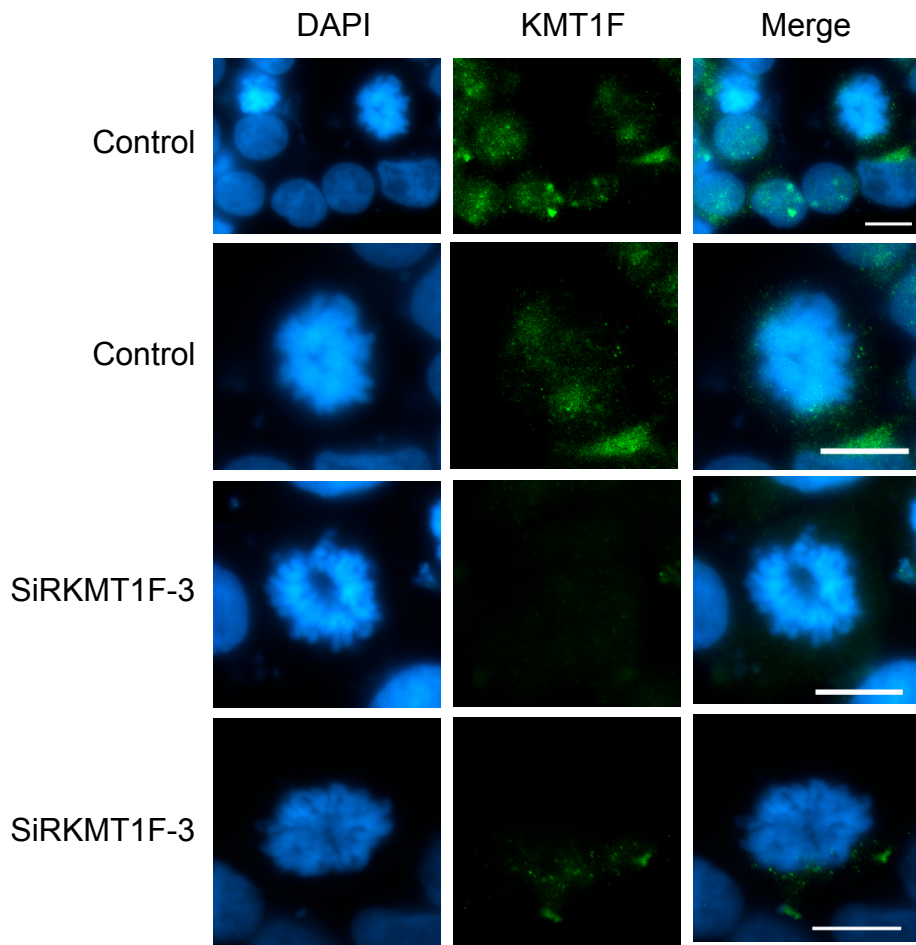

B

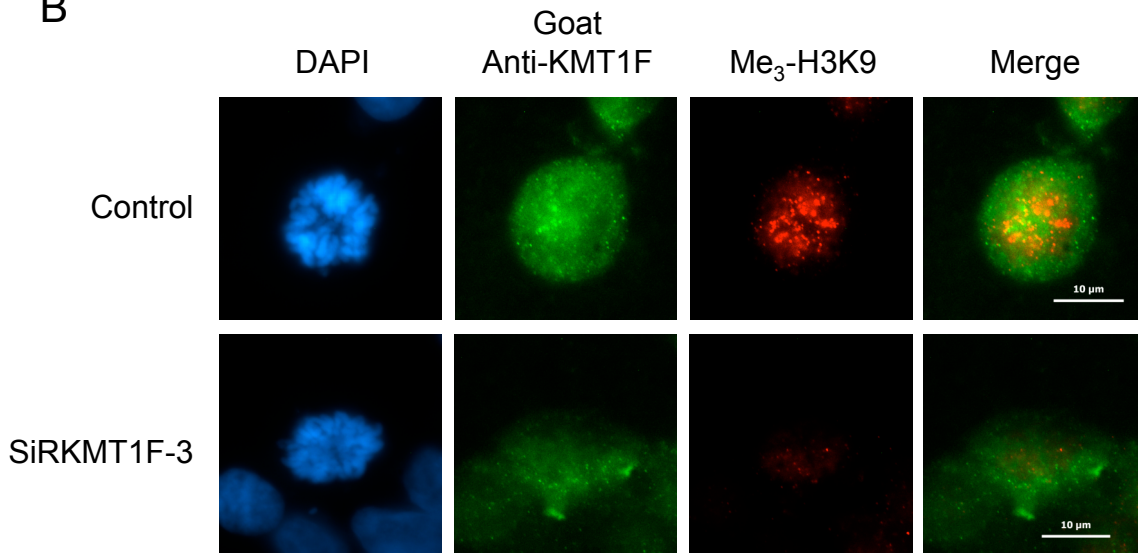

**A**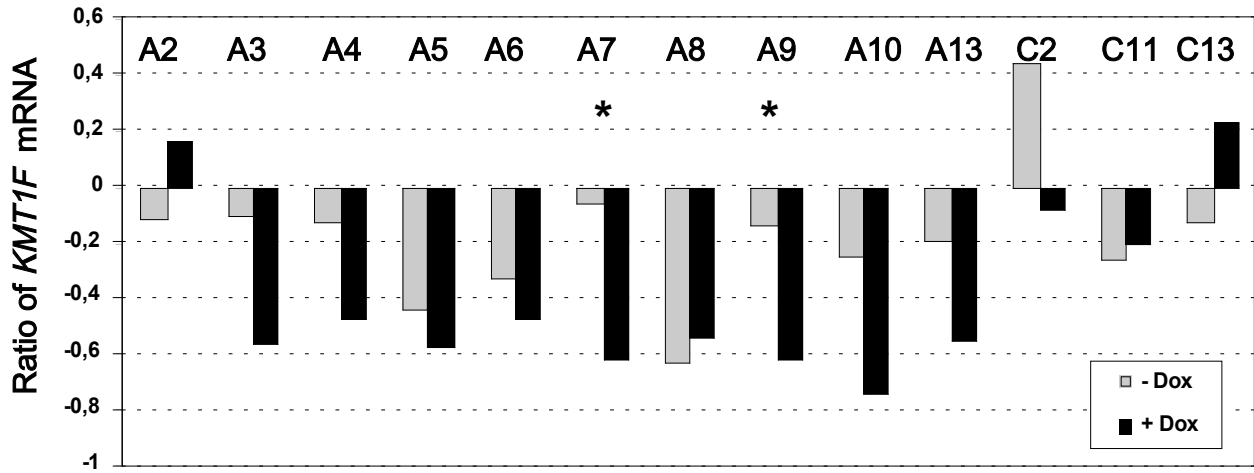**B**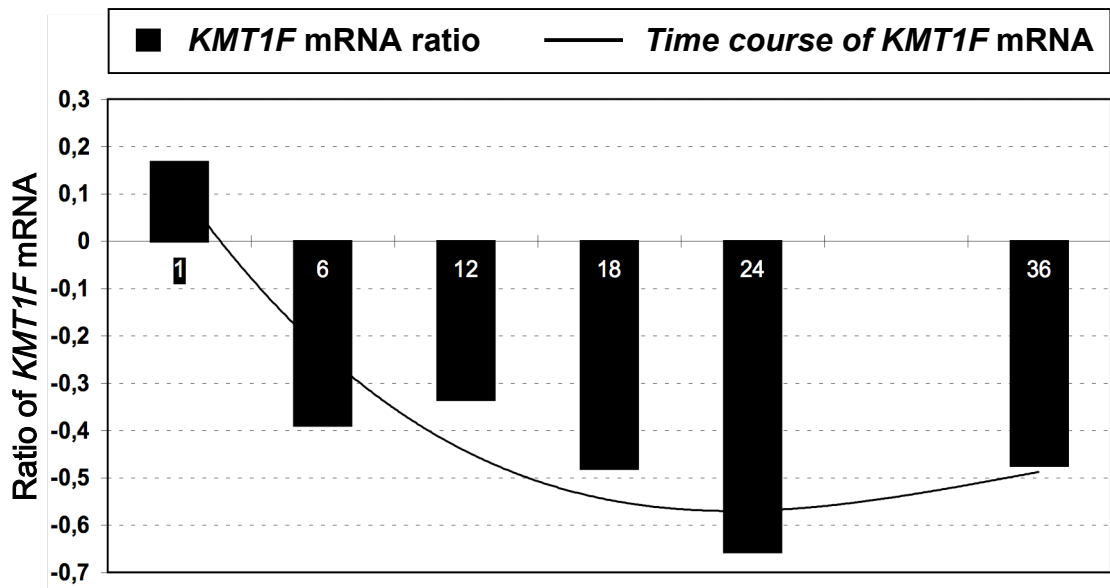

Supplement: supp_M109.052399_jbc.M109.052399-1.pdf [file supp_M109.052399_jbc.M109.052399-1.pdf]
